# Supplementary material for: Local dynamics of the photo-switchable protein PYP in ground and signalling state probed by 2D-IR spectroscopy of –SCN labels
Source: Royal Society of Chemistry journal article supplement (doi:10.1039/d0cp04307a), 2020-01-01
Supplement: d0cp04307a1.pdf [file d0cp04307a1.pdf]

## Supporting Information

### Local Dynamics of the Photo-Switchable Protein PYP in Ground and Signalling State Probed by 2D-IR Spectroscopy of -SCN Labels

Julian M. Schmidt-Engler,<sup>a</sup> Larissa Blankenburg,<sup>a</sup> Rene Zangl,<sup>b</sup> Jan Hoffmann,<sup>b</sup> Nina Morgner<sup>b</sup> and Jens Bredenbeck<sup>\*,a</sup>

<sup>a</sup>Johann Wolfgang Goethe-University, Institute of Biophysics, Max-von-Laue-Str. 1, 60438, Frankfurt am Main, Germany.

<sup>b</sup>Johann Wolfgang Goethe-University, Institute of Physical and Theoretical Chemistry, Max-von-Laue-Str. 7, 60438, Frankfurt am Main, Germany.

\*E-mail: bredenbeck@biophysik.uni-frankfurt.de

Fax: +49 69 798 46423

Tel: +49 69 798 46428

#### Contents:

- I. Linear IR absorption spectra and vibrational lifetimes from time-resolved nonlinear IR spectroscopy.
- II. Mass spectrometry ion mobility results.

#### I.

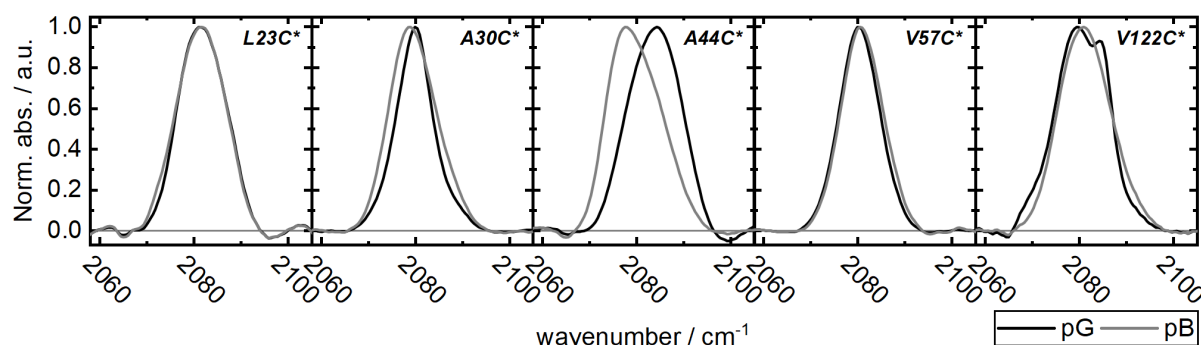

**Fig. S1** Linear absorption spectra of -SCN in the studied mutants.<sup>1</sup> The pG state is shown as black and the pB state as grey line.

**Tab. S1** Vibrational lifetimes  $T_1$  for the probed SCN labels. These were obtained by time-resolved IR pump IR probe spectroscopy in deuterated buffer.<sup>2</sup>

| Label / State    | $T_1$ / ps |
|------------------|------------|
| <b>L23C*</b> pG  | 55.5±1.2   |
| pB               | 56.0±1.5   |
| <b>A30C*</b> pG  | 55.9±1.6   |
| pB               | 52.0±1.2   |
| <b>A44C*</b> pG  | 54.1±0.9   |
| pB               | 48.0±2.9   |
| <b>V57C*</b> pG  | 34.1±2.8   |
| pB               | 52.0±7.1   |
| <b>V122C*</b> pG | 50.2±3.6   |
| pB               | 50.1±2.4   |

## II.

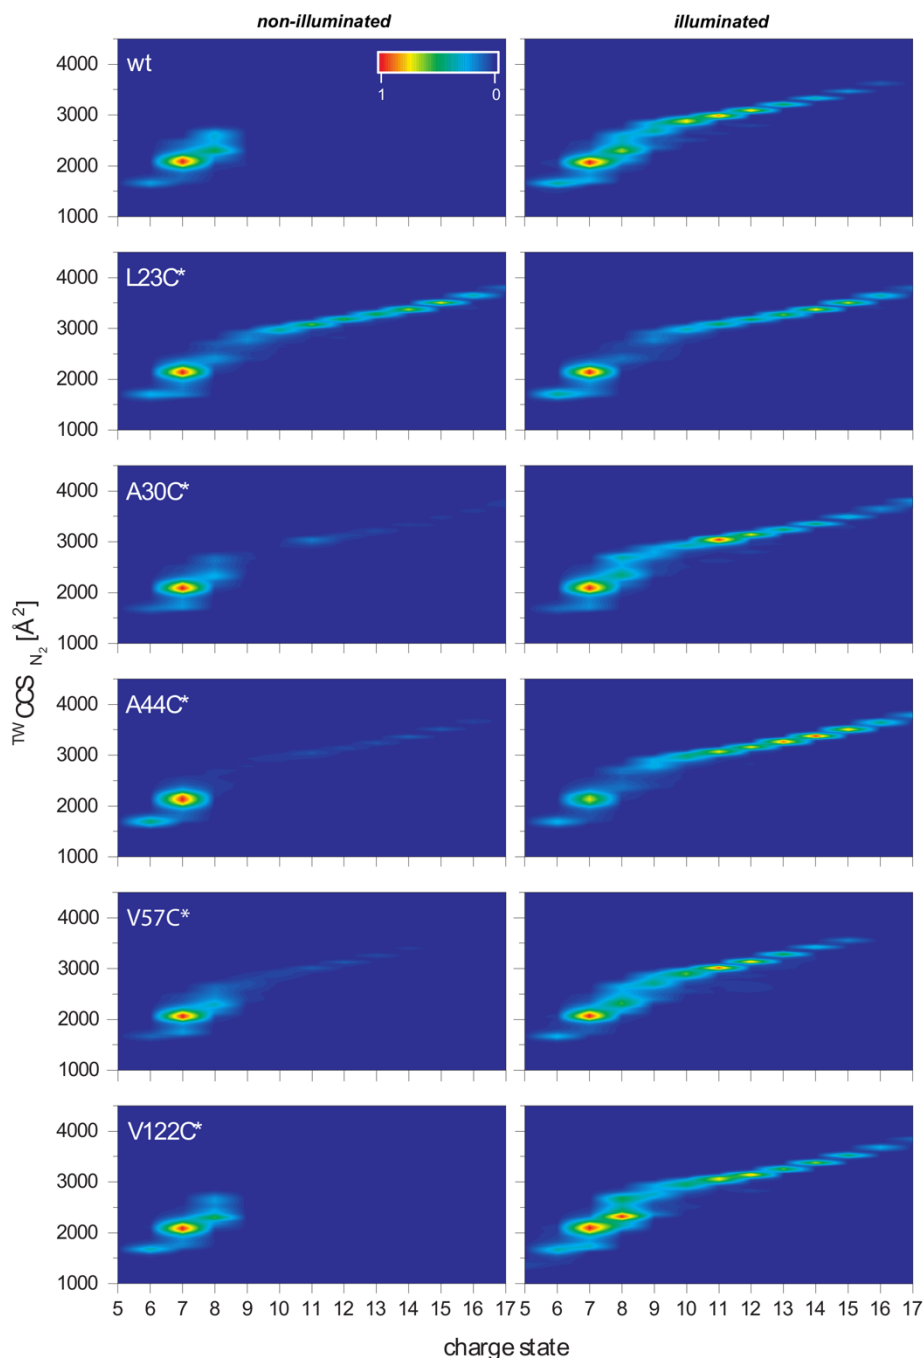

**Fig. S2** Ion mobility data of PYP under non-illuminated and illuminated conditions. The extracted ion mobilograms of the non-irradiated PYP wildtype (wt) show high signal intensities at low charge states with collision cross sections about 2000 Å<sup>2</sup>. Data acquisition of PYP-wt during nESI tip illumination results in a shift to higher charge states with an averaged collision cross section about 3000 Å<sup>2</sup>. Remarkably, despite the observation of normal switching behaviour in FTIR spectroscopy,<sup>1</sup> the L23C\* mutant shows negligible effects regarding sample illumination in the ion mobility experiment. Under both conditions a broad charge state distribution can be observed. The mutants A30C\*, A44C\*, V57C\* and V122C\* show a similar behaviour upon illumination as the wt.

## References

1. L. Blankenburg, L. Schroeder, F. Habenstein, B. Błasiak, T. Kottke and J. Bredenbeck, *Phys. Chem. Chem. Phys.*, 2019, **21**, 6622–6634.
2. J. M. Schmidt-Engler, L. Blankenburg, B. Błasiak, L. J. G. W. van Wilderen, M. Cho and J. Bredenbeck, *Anal. Chem.*, 2020, **92**, 1024–1032.
